# Supplementary material for: Combining Protein and Strain Engineering for the Production of Glyco-Engineered Horseradish Peroxidase C1A in Pichia pastoris
Source: PubMed Central journal article supplement (PMC4632689; doi:10.3390/ijms161023127), 2015-09-24
Supplement: ijms-16-23127-s001.pdf [file ijms-16-23127-s001.pdf]

## Supplementary Information

**Table S1.** Oligonucleotide primers to mutate the 4 Asn residues N13, N57, N255 and N268 of the enzyme HRP C1A, which act as *N*-glycosylation sites, to either Asp or Ser. The mutation sites are depicted in italics.

| <b>N-Site</b> | <b>Name</b> | <b>Sequence (5'→3')</b>                    |
|---------------|-------------|--------------------------------------------|
| N13           | N13D_fwd    | AAC TCT TGT CCT <i>GAT</i> GTG TCC AAC ATC |
|               | N13_rev     | AGG ACA AGA GTT ATC GTA GAA GGT TGG AGT    |
| N57           | N57S_fwd    | TCC ATC TTG CTG GAC <i>AGC</i> ACT ACC TC  |
|               | N57_rev     | GTC CAG CAA GAT GGA AGC ATC ACA ACC        |
| N255          | N255D_fwd   | TTG TTC TCC TCT CCT <i>GAC</i> GCT ACT GAT |
|               | N255_rev    | AGG AGA GGA GAA CAA CTC CTG GTC            |
| N268          | N268D_fwd   | G AGA TCC TTC GCA <i>GAC</i> TCC ACT CAA   |
|               | N268_rev    | TGC GAA GGA TCT CAC CAA TGG AAT G          |
